1 ***DROSOPHILA* MTOR COMPLEX 2 PRESERVES MITOCHONDRIAL AND CARDIAC**  
2 **FUNCTION UNDER HIGH FAT DIET TREATMENT**

3 **Authors:**

4 Kai Chang<sup>1</sup>, Guillermo A. Requejo Figueroa<sup>1</sup>, and Hua Bai<sup>1\*</sup>

5

6 **Affiliations:**

7 1 Department of Genetics, Development, and Cell Biology, Iowa State University, Ames, IA

8 50011, USA

9

10 **\*Corresponding Author:**

11 Hua Bai

12 Email: [hbai@iastate.edu](mailto:hbai@iastate.edu)

13

14 **Abstract:**

15 High fat diet (HFD)-associated lipotoxicity is one of the major causes of cardiovascular  
16 diseases. The mechanistic target of rapamycin (mTOR) pathway, especially mTOR complex 1  
17 (mTORC1), has been previously implicated in HFD-induced heart dysfunction. In the present  
18 study, we find that unlike mTORC1, mTOR complex 2 (mTORC2) protects hearts from HFD-  
19 induced cardiomyopathy and mitochondrial dysfunction in *Drosophila*. We show that HFD  
20 feeding induces contractile dysfunction along with altered mitochondrial morphology and  
21 function. Upon HFD feeding, the mitochondria of cardiomyocytes exhibit fragmentation, loss of  
22 membrane potential, and calcium overload. Interestingly, HFD feeding also reduces the activity  
23 of cardiac mTORC2. In line with this finding, the flies with cardiac-specific knockdown of  
24 *rictor*, the key subunit of mTORC2, show cardiac and mitochondrial dysfunction similar to what  
25 is observed in HFD-fed wild-type flies. Conversely, cardiac-specific activation of mTORC2 by  
26 overexpressing *rictor* attenuates HFD-induced mitochondrial and cardiac dysfunction. Thus, our  
27 findings suggest that mTORC2 is a cardioprotective factor and regulates mitochondrial  
28 homeostasis upon HFD feeding.

29

30 **Key words:** mTORC2, rictor, mitochondrial dynamics, semi-automatic optical heartbeat  
31 analysis (SOHA)

32

## 33 **Introduction**

34 Obesity has grown to pandemic levels with nearly three folds increases since 1975  
35 (Blüher 2019). Increasing evidence suggests that obesity and its associated metabolic disorders  
36 caused by excessive fat intake increase the risk of developing secondary diseases such as type-2  
37 diabetes and cardiovascular diseases (Birse and Bodmer 2011). Obese people and type-2 diabetic  
38 patients exhibit several cardiac dysfunctions including ventricular remodeling, diastolic/systolic  
39 dysfunction, decreased fractional shortening, and prolonged QT intervals (Christoffersen,  
40 Bollano et al. 2003, Birse, Choi et al. 2010, Birse and Bodmer 2011, Zhang and Ren 2011).  
41 Cardiomyocytes require a constant supply of energy in the form of adenosine triphosphate (ATP)  
42 to support its contractile function. Under normal condition, most ATP in cardiomyocytes is  
43 generated through  $\beta$ -oxidation of free fatty acids (FFAs). During the development of obesity due  
44 to high caloric intake, the availability of FFAs is increased in the heart, which in turn promotes  
45 fatty acid oxidation that eventually leads to contractile dysfunction (Lopaschuk, Folmes et al.  
46 2007, Birse, Choi et al. 2010).

47 Mitochondrial dysfunction contributes significantly to the progression of cardiomyopathy  
48 under nutrient overload (Boudina, Sena et al. 2007, Lopaschuk, Folmes et al. 2007).  
49 Mitochondria are highly dynamic organelles and their morphology and function are often altered  
50 upon high fat diet (HFD) treatment, such as fragmented mitochondria, decreased complex I  
51 activity, and induction of mitophagy. In contrast, other studies reported that mitochondrial  
52 function was unaffected or even increased after feeding [16], [17]. Therefore, it is necessary to  
53 define the precise mitochondrial responses to HFD so that we could better understand the  
54 mechanisms underlying HFD-induced mitochondrial changes, especially in the heart.

55 The mechanistic target of rapamycin (mTOR) pathway is a highly conserved nutrient-  
56 sensing pathway that functions through two structurally and functionally distinct complexes,  
57 mTOR complex 1 (mTORC1) and mTOR complex 2 (mTORC2), to regulate a wide range of  
58 cellular function including protein synthesis, ribosomal and mitochondrial biogenesis,  
59 autophagy, and metabolism [18], [19]. Abundant evidence suggests that obesity and nutrient  
60 overload induce a hyper-activation of mTOR activity in multiple tissues, contributing to the  
61 development of type-2 diabetes and insulin resistance [20]. Recently, a study in *Drosophila*  
62 showed that mTOR signaling also plays a central role in HFD-induced heart dysfunction.  
63 Reducing insulin-mTOR pathway activity prevents HFD-induced triglyceride levels and cardiac

64 abnormalities[5]. Additionally, increasing AMPK/mTOR pathway activity has also been  
65 observed in rats fed with HFD to mediate vascular dysfunction and remodeling [21]. However,  
66 the above studies did not differentiate the effects coming from two mTOR complexes. To our  
67 knowledge, most of the genetic manipulation that induces mTOR activity is achieved by  
68 activating mTORC1 activity.

69 Compared with mTORC1, the upstream signals and downstream substrates of mTORC2  
70 are less known. Recently studies suggest that mTORC2 might also play a role in HFD-induced  
71 obesity and insulin resistance via an unknown mechanism[20], [22]–[24]. For example, HFD  
72 significantly decreases the protein levels of mTORC2 and pAKT, which is opposite to the  
73 protein levels of mTORC1[22]. Mice with mTORC2 deficiency display glucose tolerance that is  
74 generally observed in HFD treatment[25]. A recent study in neurons suggests that mTORC2  
75 might also affect how rewarding high fat foods are[23]. Interestingly, a recent study has shown  
76 that mTORC2 localizes to mitochondrial-associated endoplasmic reticulum (ER)-membranes  
77 (MAMs) to regulate mitochondrial physiology[26]. As its name indicated, MAMs represent a  
78 region where ER makes contact with mitochondria. MAMs are involved in importing the lipid  
79 and calcium from the ER to mitochondria and regulating mitochondrial dynamics and  
80 metabolism[27]. Moreover, this crosstalk between mitochondria and ER is a prerequisite for  
81 healthy cardiac function[28], [29]. Therefore, it is likely that mTORC2 might regulate HFD-  
82 induced obesity and cardiac dysfunction via mediating mitochondrial physiology at MAMs.  
83 Collectively, mTORC2 seems to play a different, or even an opposite role to mTORC1 in the  
84 regulation of HFD-induced obesity, which requires further investigation.

85 *Drosophila melanogaster* has recently emerged as a suitable model to investigate the  
86 genetic mechanisms underlying HFD-induced obesity and cardiac dysfunction[30]–[34].  
87 *Drosophila* fed a HFD exhibit increased triglyceride fat, deregulation of insulin-mTOR  
88 signaling, insulin resistance, oxidative stress, metabolic inflexibility, and cardiac dysfunction. A  
89 recent study in *Drosophila* skeletal muscles showed that mitochondrial respiration is also  
90 affected by HFD treatment even though measurements on other mitochondrial physiology such  
91 as mitochondrial morphology and membrane potential are still lacking[17]. In this study, we  
92 used *Drosophila* as our model to investigate mitochondrial responses under HFD, especially in  
93 the heart, and the role of mTORC2 in regulating these responses. Our results indicated that  
94 mTORC2 could provide cardio-protection in response to HFD.

## 95 **Results**

96 To better understand how HFD affects heart function in *Drosophila*, we first investigate  
97 the cardiac mitochondrial physiology and cardiac contractile function after feeding a HFD.  
98 Specifically, we fed *Drosophila* either a standard diet (SD) or a HFD (SD supplemented with  
99 20% (w/v) coconut oil) for five days before the measurement. Several studies suggest that HFD  
100 induces a shift toward mitochondrial fission (Chen, Li, Zhang, Zhu, & Gao, 2018; Jheng et al.,  
101 2012; Leduc-Gaudet et al., 2018). Consistently, we found that the cardiac mitochondria became  
102 fragmented upon five days HFD treatment, indicated by a significantly increased number of  
103 smaller mitochondria in the HFD-treated heart (Figure 1A, B). Mitochondrial membrane  
104 potential ( $\Delta\Psi_m$ ), as an essential component in oxidative phosphorylation, is a crucial indicator of  
105 mitochondrial activity, especially for cells with high ATP demand, such as cardiomyocytes,  
106 where ATP turnover has greater control over mitochondrial respiration and mitochondrial  
107 membrane potential. Therefore, we measured the mitochondrial membrane potential by  
108 tetramethylrhodamine ethyl ester (TMRE), a cell-permeable and cationic red-orange dye, in  
109 *Drosophila* heart fed with a HFD as well. We found that five days of HFD feeding significantly  
110 decreased  $\Delta\Psi_m$  in *Drosophila* heart than SD, suggesting that HFD impairs the cardiac  
111 mitochondrial respiration (Figure 1C, D).

112 Calcium ( $Ca^{2+}$ ) plays a critical role in regulating mitochondrial energy production and  
113 apoptosis. Besides, mitochondrial  $Ca^{2+}$  uptake has been closely linked to the regulation of  
114 mitochondrial dynamics and membrane potential. Mitochondrial membrane potential also serves  
115 as the driving force for  $Ca^{2+}$  uptake into the mitochondrial matrix. Thus, we next measured the  
116 mitochondrial  $Ca^{2+}$  levels in the HFD heart by normalizing mitochondrial-targeted  $Ca^{2+}$  reporter  
117 mito-GCaMP5 to mitochondrial mass (DsRed-mito). Our results indicated that HFD significantly  
118 increased the mitochondrial  $Ca^{2+}$  levels in the fly heart (Figure 1E, F).

119 Finally, we investigated how does HFD affects heart contractile function. In line with a  
120 previous study (Ryan T Birse et al., 2010), we also observed cardiac dysfunction reminiscent to a  
121 restrictive heart under HFD treatment [35]. Specifically, HFD slightly reduced diastolic diameter  
122 (DD) and significantly diminished diastolic interval (DI), and fractional shortening (FS) (Figure  
123 2A-C) Collectively, HFD affects cardiac mitochondrial physiology as well as heart function in  
124 *Drosophila*.

125 Previous studies suggest that MTORC2 plays a role in HFD-induced obesity and  
126 MTORC2/ric1or deficiency displays HFD-related phenotypes (Bae et al., 2016; Chellappa et al.,  
127 2019; Cybulski et al., 2009; Dadalko et al., 2015; Mao & Zhang, 2018). Similarly, we also  
128 observed that cardiac-specific *ric1or* knockdown resulted in changes similar to HFD-induced  
129 alterations of mitochondrial physiology and cardiac contractile patterns. We found that knocking  
130 down *ric1or* in the heart induced mitochondrial fragmentation, dissipation of mitochondrial  
131 membrane potential, Ca<sup>2+</sup> levels, and adversely affects cardiac function, including reducing DI,  
132 FS, and DD (Figure 2A-C). Consistently, we also found that the MTORC2/ric1or protein level in  
133 the heart is reduced by five days of HFD treatment (Figure 3A, B). Therefore, reduced  
134 MTORC2/ric1or activity in the heart at least partially takes part in regulating HFD-induced  
135 alterations in mitochondrial physiology and cardiac function in *Drosophila*.

136 At last, we verified whether increasing MTORC2/ric1or activity in the heart could rescue  
137 the HFD-induced mitochondrial and cardiac dysfunction. Our results suggested that cardiac-  
138 specific overexpression *ric1or* prevents HFD-induced mitochondrial fragmentation (Figure 4A,  
139 C), dissipation of mitochondrial membrane potential (Figure 4B, D), and cardiac dysfunction  
140 (Figure 5A, B). Therefore, we concluded that MTORC2/ric1or could provide cardio-protection in  
141 response to HFD.

142

## 143 Discussion

144 In this study, we evaluated the mitochondrial physiology and the contractile function in  
145 *Drosophila* heart when exposing to a HFD compared to a SD. Our results showed that HFD  
146 reduces mTORC2/ric1or activity and induces mitochondrial fragmentation, dissipation of  
147 membrane potential, mitochondrial Ca<sup>2+</sup> levels, and contractile dysfunction in *Drosophila* heart.  
148 Knocking down mTORC2/ric1or in heart phenocopied above HFD-induced changes even on a  
149 SD, while overexpressing mTORC2/ric1or in heart abolished above HFD-induced mitochondrial  
150 and cardiac dysfunction. Our study revealed a novel role of mTORC2/ric1or in regulating cardiac  
151 mitochondrial physiology and HFD-induced cardiac dysfunction.

152 Mitochondria are known to change their architecture to meet the bioenergetic needs under  
153 different nutrient environments. Generally speaking, mitochondria tend to remain fragmented  
154 under lipid overload or other rich-nutrient environment and elongated under starvation  
155 conditions[36], [37]. This nutrient-induced mitochondrial fission supports “energy wasting” by

156 enhancing uncoupling and basal protein conductance, which helps an increase in mitochondrial  
157 respiration meanwhile, a decrease in ATP synthesis efficiency[36], [37]. The mechanism by  
158 which mitochondrial fragmentation enhances uncoupling is not yet understood. One of the  
159 possibilities is that fragmentation might represent a change in cristae structures that allows the  
160 increased nutrient import and prevents mitochondrial ATP synthase dimerization[37], [38]. Even  
161 though mitochondrial fission seems to provide an adaptive response initially under a HFD, long-  
162 term exposure to nutrient overload such as a HFD still leads to increased ROS production, which  
163 is the major contributor to insulin resistance and mitochondrial dysfunction[39].

164 Mitochondrial membrane potential is highly correlated with the mitochondrial respiration  
165 rate[40]. The effect of nutrient overload on mitochondrial respiration and membrane potential  
166 remains controversial. Some studies suggest that nutrient excess increases mitochondrial  
167 respiration and membrane potential[41], [42], whereas others indicate that mitochondrial  
168 respiration is impaired by nutrient overload[17], [43]. A recent study in *Drosophila* skeletal  
169 muscles showed that mitochondrial respiration increases after two days on a HFD, followed by a  
170 significant decrease in mitochondrial respiration after four days of a HFD feeding. They  
171 demonstrated that the increased carbohydrates oxidation might contribute to the initial  
172 mitochondrial respiration increase since carbohydrates are the main fuel sustaining mitochondrial  
173 metabolism in muscles[44]. After continuous exposure to a HFD, the metabolic inflexibility  
174 occurs due to accumulated FFAs and depleted carbohydrates. Ultimately, the impairment of  
175 mitochondrial respiration ensues[17]. This evidence suggests that HFD treatment duration is one  
176 possible reason for the previous divergent results on mitochondrial membrane potential  
177 measurement. In addition, different cell types act distinctly to sense nutrients and utilize energy.  
178 For instance, nutrient utilization and its availability have greater control over mitochondria  
179 respiration and membrane potential in nutrient sensors such as beta cells. In contrast, ATP  
180 turnover significantly influences mitochondrial respiration and membrane potential in cells under  
181 high ATP demand such as muscle cells[37]. Therefore, the HFD-induced dissipation of cardiac  
182 mitochondrial membrane potential observed in our study is more likely to represent a deleterious  
183 condition caused by reduced ATP turnover, where the energy to support the contractile function  
184 is compromised. Unlike skeletal muscle, cardiomyocyte generates mostly ATP via fatty acid  
185 oxidation[6], which might explain why we did not see an increase in mitochondria membrane  
186 potential upon two days of HFD feeding.

187  $\text{Ca}^{2+}$ , a well-known regulator for mitochondrial function, is imported into the  
188 mitochondria matrix driven by membrane potential[40]. Once the  $\text{Ca}^{2+}$  enters the mitochondrial  
189 matrix, it controls the activities of several dehydrogenases in Krebs cycles, therefore regulates  
190 mitochondrial bioenergetics[45]. However, on the other hand, under the  $\text{Ca}^{2+}$  overload condition,  
191 increasing  $\text{Ca}^{2+}$  levels within the matrix could also promote mitochondrial permeability  
192 transition pore (mPTP) opening and dissipate mitochondria membrane potential[46]. Beyond  
193 mitochondrial energy metabolism, mitochondrial  $\text{Ca}^{2+}$  also promotes apoptosis under various  
194 stress conditions[47]. Recently, increasing evidence also suggests crosstalk between  
195 mitochondrial  $\text{Ca}^{2+}$  uptake and mitochondrial fission since both of these processes require the  
196 proximity between ER and mitochondria[48]–[50]. Collectively, mitochondrial  $\text{Ca}^{2+}$  is involved  
197 in a wide range of mitochondrial functions including mitochondrial fission and membrane  
198 potential. A recent study showed that obesity leads to increased mitochondrial  $\text{Ca}^{2+}$  uptake from  
199 ER via the MAM connections[51], and mitochondrial  $\text{Ca}^{2+}$  overload is known to lead to mPTP  
200 opening that triggers cardiac reperfusion injury[52], [53]. Indeed, HFD has shown to increase the  
201 vulnerability of hearts to ischemic reperfusion[54]. Therefore, the HFD-induced cardiac  
202 dysfunction observed in our studies might be due to deregulated mitochondrial  $\text{Ca}^{2+}$  uptake.  
203 Altogether, based on previous studies and our results, we speculate that the decreased  
204 mitochondrial function observed on five days of a HFD is not a regulated adaptive process but  
205 instead caused by damaging effects caused by nutrient excess.

206 To the best of our knowledge, there is only one study investigated the direct regulation  
207 between mTORC2 and mitochondria[26] despite some of the indirect evidence suggesting that  
208 mTORC2 is involved in mitochondrial quality control[55], [56]. In that specific study, they  
209 found that mTORC2 localizes to MAM to regulate its integrity and inhibits ER calcium release  
210 through IP3R. Therefore, testing whether mTORC2 provides cardioprotection via regulating  
211 MAM integrity and  $\text{Ca}^{2+}$  flux in response to a HFD could be one of the future directions.  
212 Additionally, our previous study has shown that mTORC2 slows cardiac aging through  
213 activating autophagy[57]; it is possible that mTORC2 also activates mitophagy to protect the  
214 heart from a HFD. In summary, our studies revealed a novel role of mTORC2 in the regulation  
215 of mitochondria in a HFD heart, study the mechanistic link between mTORC2 and mitochondria  
216 in the future could provide new insights for understanding mTORC2 and obesity-induced  
217 cardiovascular diseases.



## 218 **Materials and Methods**

### 219 *Fly Husbandry and Stocks*

220 Flies were maintained at 25°C, 60% relative humidity and 12 h light/dark. Female flies  
221 (1-2 weeks of age) were fed on a SD (agar-based diet with 0.8% cornmeal, 10% sugar, and 2.5%  
222 yeast) or a HFD (SD supplemented with 20% w/v coconut oil) for 5 days at constant densities (5  
223 flies per vial). Fly stocks used in the present study are: *UAS-rictor RNAi* (BDSC, 31527),  
224 *Hand4.2-gal4* [58], *UAS-rictor* [59], *UAS-mito-GCaMP5/DsRed-mito* (Gift from Fumiko  
225 Kawasaki, Pennsylvania State University). *ywR* flies were used as control or wild-type (*WT*)  
226 flies.

227

### 228 *Fly Heartbeat Analysis*

229 To measure cardiac function parameters, semi-intact *Drosophila* adult fly hearts were  
230 prepared according to previously described protocols [60]. In this study, we used the previous  
231 published fly heartbeat analysis [57]. In brief, flies were dissected to expose their hearts in  
232 oxygenated artificial hemolymph (AHL). Then high-speed digital movies of heartbeats were  
233 taken, and analyzed for DI, FS, etc.

234

### 235 *Immunostaining and Imaging*

236 To investigate mitochondrial morphology in heart, we used ATP5A1 antibody (1:200;  
237 Invitrogen 15H4C4), which marks the mitochondrial ATP synthase. We used Alexa Fluor 594-  
238 conjugated phalloidin for F-actin staining (Thermo Fisher Scientific, A12381). All fluorescence-  
239 conjugated secondary antibodies were from Jackson ImmunoResearch (Alex Fluor 488).

240 For immunostaining, adult female flies were collected and dissected in AHL. Hearts were  
241 then incubated in relaxing buffer (AHL with 10mM EGTA) briefly to inhibit contractions. After  
242 fixing in 4% paraformaldehyde for 15 min at room temperature (RT), hearts were washed in PBS  
243 with 0.1% Triton X-100 (Fisher Scientific, BP151-100) (PBST) and then blocked in 5% normal  
244 donkey serum (NDS; Jackson ImmunoResearch, 005-000-121) diluted in PBST for 1 h at RT.  
245 Hearts were then washed with PBST and incubated overnight at 4°C with primary antibodies  
246 diluted in 5% NGS. After washing with PBST, the samples were incubated for 2 h at RT with  
247 appropriate fluorescence-conjugated secondary antibodies. Hearts were mounted in ProLong

248 Diamond antifade reagent (Thermo Fisher Scientific, P36361) before being imaged using a  
249 FV3000 Confocal Laser Scanning Microscope (Olympus).

250 For image analysis and quantification, fluorescence images were analyzed in Olympus  
251 cellSens software. The mitochondria in a selected region of interest (ROI,  $\sim 400 \mu\text{m}^2$ ) within  
252 heart tube were measured with the “Measure and Count” module in Olympus cellSens software.  
253 To quantify the mitochondria size, the area for each object/mitochondrion was measured and  
254 plotted in a distribution plot.

255

#### 256 *TMRE staining*

257 Flies were anesthetized and dissected in cold AHL. Hearts were then incubated in TMRE  
258 staining solution, consisting of 100nM of TMRE (Invitrogen, T668) in AHL for 12 min at RT.  
259 Samples were then rinsed twice for 30 s each wash with s solution consisting of 25 nM of TMRE  
260 in AHL. Hearts that attached to abdomen were quickly mounted in the same medium onto the  
261 slide and imaged within 15-20 min using identical setting on the confocal microscope.  
262 quantification of TMRE staining is done using cellSens, where mean intensity profile for the  
263 TMRE stains were quantified.

264

#### 265 *Measurement of Mitochondrial Calcium*

266 The Hand4.2-gal4 driver was used to drive the expression of UAS-mito-GCAMP5 and  
267 UAS-mito-DsRed reporter combination in adult heart. Flies were dissected to expose hearts in  
268 AHL, then the hearts that attached to the abdomen were immediately placed on the slides for live  
269 imaging. Images were taken with FV3000 Confocal Laser Scanning Microscope with a 100x oil-  
270 immersion objective lens. The mitochondrial calcium detected by mito-GCaMP5 were  
271 normalized with the UAS-mito-DsRed, which represents the mitochondrial mass.

272

#### 273 *Western Blotting for MTORC2*

274 The phosphorylation of AKT is used to represent MTORC2 activity [57]. 25-28  
275 *Drosophila* adult hearts were collected for each sample. RIPA lysis buffer (Thermo Fisher  
276 Scientific, PI36978) was used to extract protein sample. Supernatants were collected and loaded  
277 onto Mini-PROTEAN precast gels (Bio-Rad Laboratories, 456–1095) using standard procedures.  
278 Blots were then incubated with primary and secondary antibodies. Primary antibodies used in

279 this study included *Drosophila* p-Akt1 (Ser505) (1:1000) (CST, 4054) and AKT1 (Pan) (1:2000)  
280 (CST, 4691). All HRP-conjugated secondary antibodies are from Jackson ImmunoResearch. The  
281 blots were visualized with Pierce ECL Western Blotting Substrate (Thermo Fisher Scientific,  
282 PI34577). The images were analyzed by Image Lab.

283

#### 284 *Statistical Analysis*

285 GraphPad Prism (GraphPad Software) was used for statistical analysis. To compare the  
286 mean value of treatment groups versus that of control, either student t-test or one-way ANOVA  
287 was performed using Tukey multiple comparison. In SOHA analysis, the outliers were identified  
288 using Robust regression and Outlier removal (ROUT) method (Q = 1%) prior to the data  
289 analysis.

290

#### 291 **Figure and Table**

292 **Table 1.** Time-dependent HFD-induced mitochondrial responses in rodent.

| HFD Duration | Mitochondrial Responses                                                                                                                                                                             | Reference  |
|--------------|-----------------------------------------------------------------------------------------------------------------------------------------------------------------------------------------------------|------------|
| 2 weeks      | Increased mRNA expression of mitochondrial dynamic genes, and fatty acid transport genes and uncoupling protein genes. Increased Drp1 protein content in skeletal muscles.                          | [61]       |
| 15 days      | Decreased activity of respiratory chain enzymes complex I, II, IV, and V in liver. Elevated GLUT1, 3 protein expression, reduced GLUT2, 4 protein expression in liver, skeletal and adipose tissue. | [62]       |
| 3 weeks      | Increased mitophagy in heart. Slightly lower mitochondrial enzyme activity, reduced mRNA for genes involved in OXPHOS and mitochondrial biogenesis in skeletal muscles.                             | [63], [64] |
| 4 weeks      | Glucose intolerance, insulin resistance, increased mitochondrial biogenesis and impaired ADP sensitivity in skeletal muscles.                                                                       | [65]–[67]  |
| 8 weeks      | Decreased mitochondrial density, impaired glucose metabolism in skeletal muscles.                                                                                                                   | [68]       |
| 2 months     | Reduced autophagy but continuously increased mitophagy in heart.                                                                                                                                    | [63]       |
| 10 weeks     | Decreased maximal mitochondrial respiration, increased Fis1 level in skeletal muscles.                                                                                                              | [69], [70] |
| 12 weeks     | Reduced mitochondrial metabolic flexibility in skeletal muscles.                                                                                                                                    | [71]       |

|          |                                                                                                                                                                                                                                                                                                              |                  |
|----------|--------------------------------------------------------------------------------------------------------------------------------------------------------------------------------------------------------------------------------------------------------------------------------------------------------------|------------------|
| 16 weeks | Increased MAM formation, mitochondrial Ca <sup>2+</sup> overload, increased ROS generation, impaired insulin action and abnormal glucose metabolism in liver. Decreased mitochondrial membrane potential and ATP production, impaired glucose tolerance, increased Fis1 and Drp1 levels in skeletal muscles. | [51], [68], [70] |
| 28 weeks | Decreased mitochondrial energy production and biogenesis, changed mitochondrial morphology, decreased mRNA levels for mitochondrial dynamic genes, decreased MFN1, MFN2, OPA1 protein content, increased phosphorylated Drp1 and Fis1 protein levels in heart and heart hypertrophy.                         | [72]             |
| 42 weeks | Abnormal metabolism, heart dysfunction, increased ER stress, decreased autophagy and mitophagy (decreased PINK1 and Mfn2) in heart.                                                                                                                                                                          | [73]             |

293  
294  
295  
296  
297  
298  
299  
300  
301  
302  
303  
304  
305  
306  
307  
308  
309  
310  
311  
312  
313  
314

315

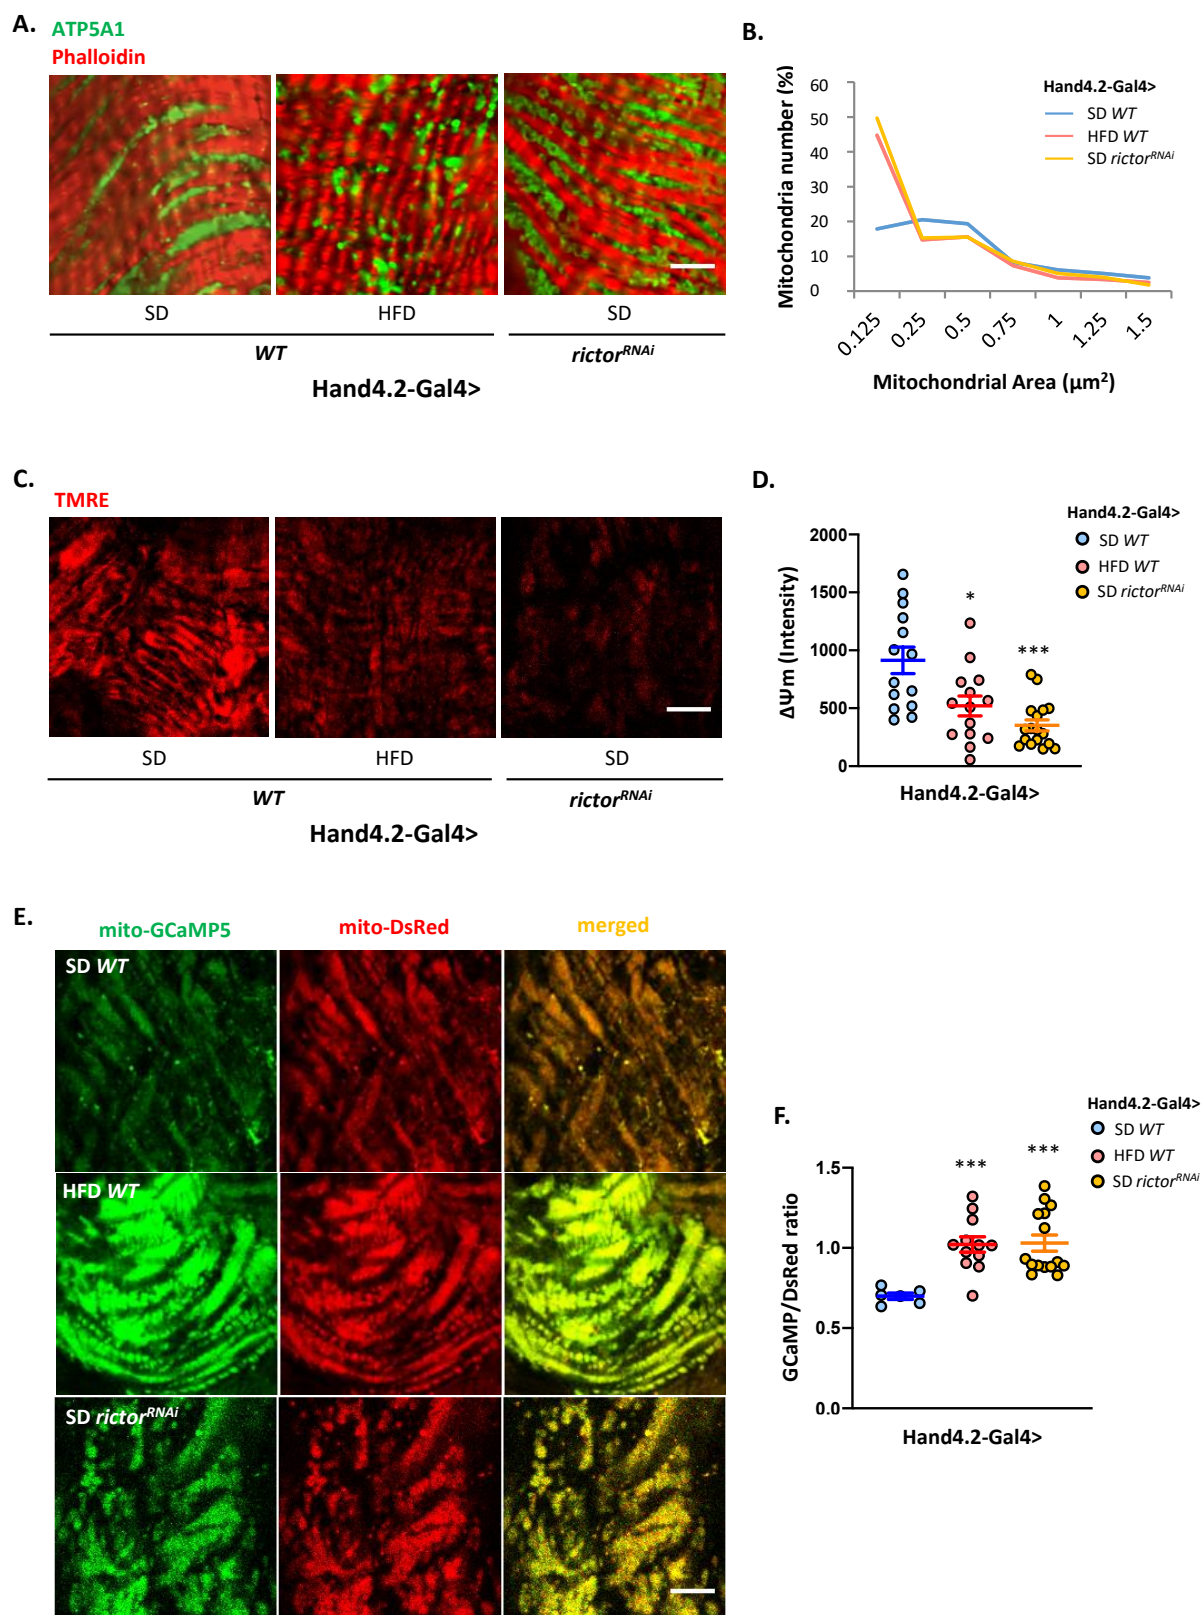

316

317 **Figure 1.** HFD and *rictor* knockdown alters mitochondrial physiology in *Drosophila*  
318 heart. (A) Area of mitochondria in the heart of wildtype or cardiac-specific *rictor* knockdown  
319 upon 5 days of HFD feeding. ATP5A1 antibodies were used to detect mitochondria and  
320 phalloidin was used to stain F-actin. (B) The group histogram data for mitochondrial area shown  
321 in (A). (C) Mitochondrial membrane potential measured by TMRE in the heart of wildtype or  
322 cardiac-specific *rictor* knockdown upon 5 days of HFD feeding. (D) The intensity profile of  
323 TMRE measured in (C). (E) Wildtype or *rictor* knockdown heart expressing mito-GCaMP5, and  
324 mito-DsRed upon 5 days of HFD feeding. (F) mito-GCaMP5 signal is normalized with  
325 mitochondrial mass (mito-DsRed) to represent the mitochondrial calcium level in heart. Flies  
326 were cultured at 40% relative humidity. *Hand-gal4* driver was used to drive gene expression  
327 specifically in cardiac tissues (cardiomyocytes and pericardial cells). Scale bar is 5  $\mu$ m. N=4-6  
328 and 3 ROIs were selected for each heart sample. Student t-test (\*  $p < 0.05$ , \*\*\*  $p < 0.01$ ).

329

330

331

332

333

334

335

336

337

338

339

340

341

342

343

344

345

346

347

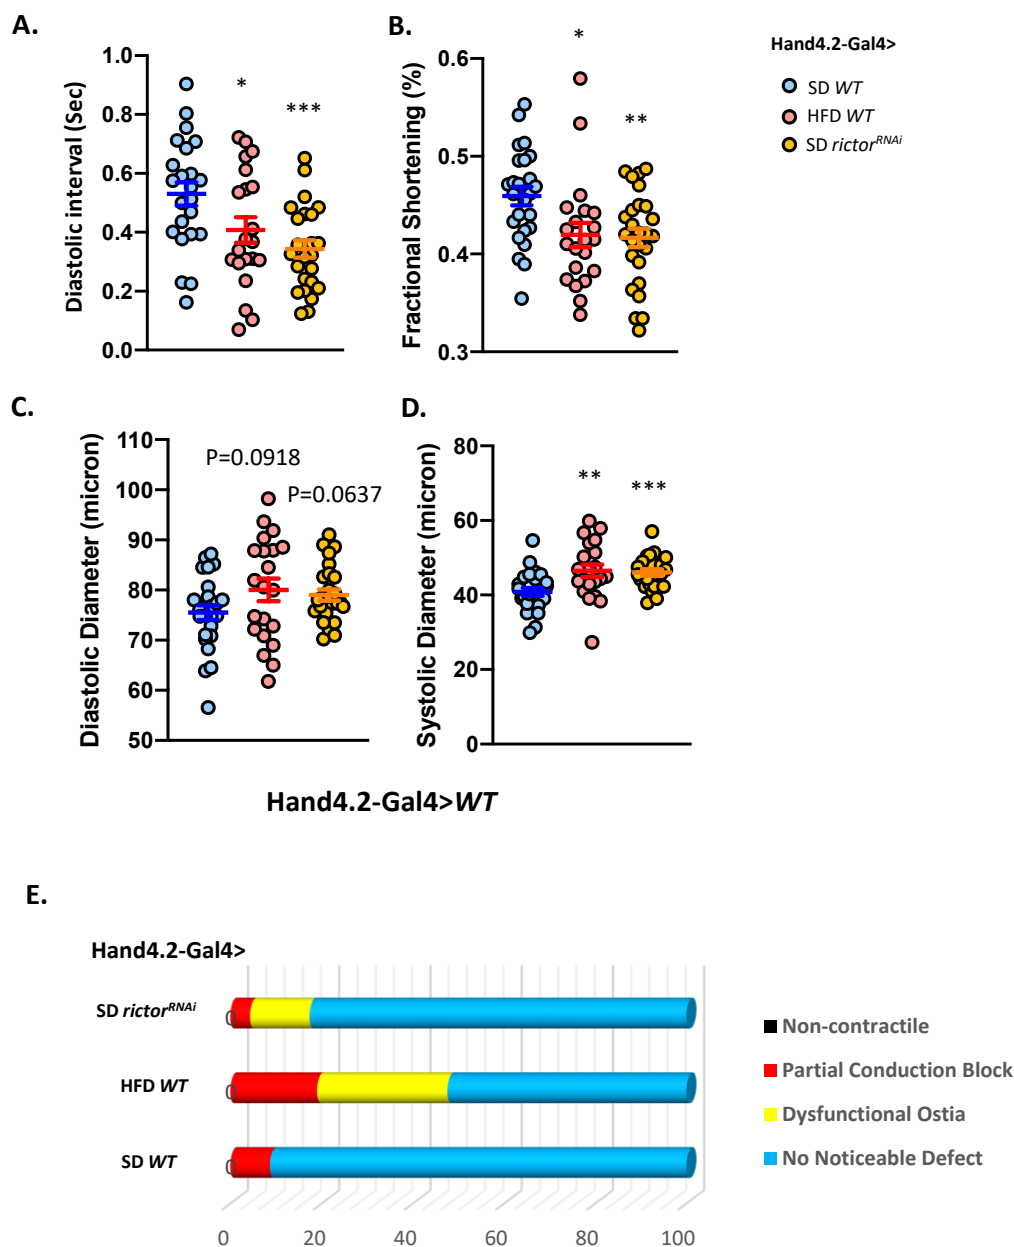

348

349 **Figure 2.** HFD alters cardiac function in *Drosophila*. (A) Diastolic interval (DI), (B)  
 350 fractional shortening (FS), and (D) diastolic diameter (DD) of wildtype or *rictor* knockdown  
 351 heart upon 5 days of HFD feeding. Flies were cultured at 40% relative humidity. *Hand-gal4*  
 352 driver was used to drive gene expression specifically in cardiac tissues (cardiomyocytes and  
 353 pericardial cells). N=21-25. Student t-test (\* p<0.05, \*\* p<0.01, \*\*\* p<0.001, ns: not  
 354 significant).

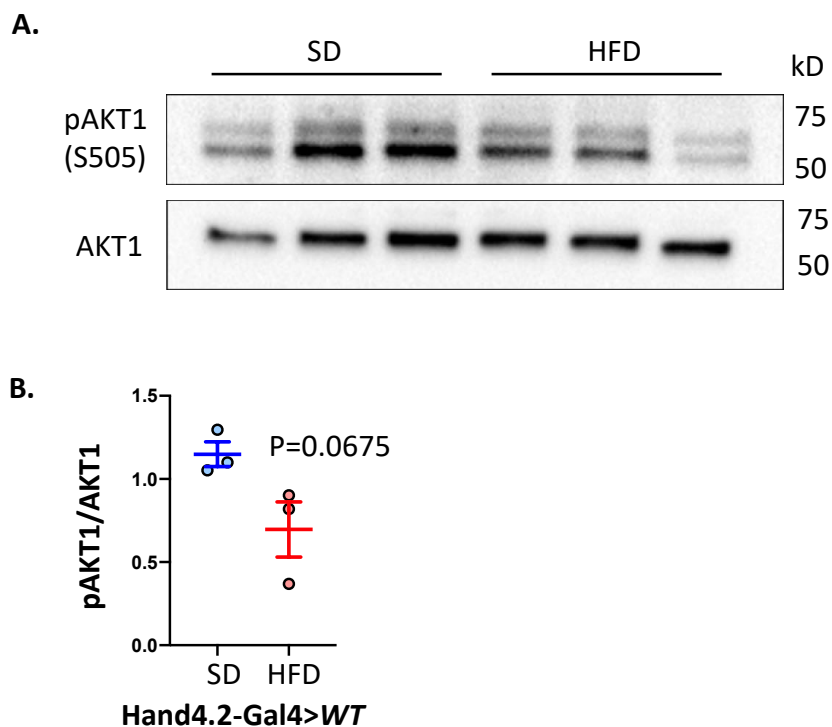

355

356

357 **Figure 3.** HFD reduces rictor activity in *Drosophila* heart. (A) Western blot analysis on

358 Akt1 phosphorylation of hearts dissected from wildtype flies treated with 5 days of HFD. (B)

359 The level of Akt1 phosphorylation is normalized to total Akt1 protein. Flies were cultured at

360 40% relative humidity. *Hand-gal4* driver was used to drive gene expression specifically in

361 cardiac tissues (cardiomyocytes and pericardial cells). N=3 and 25-27 hearts were collected for

362 each sample. Student t-test.

363

364

365

366

367

368

369

370

371

372



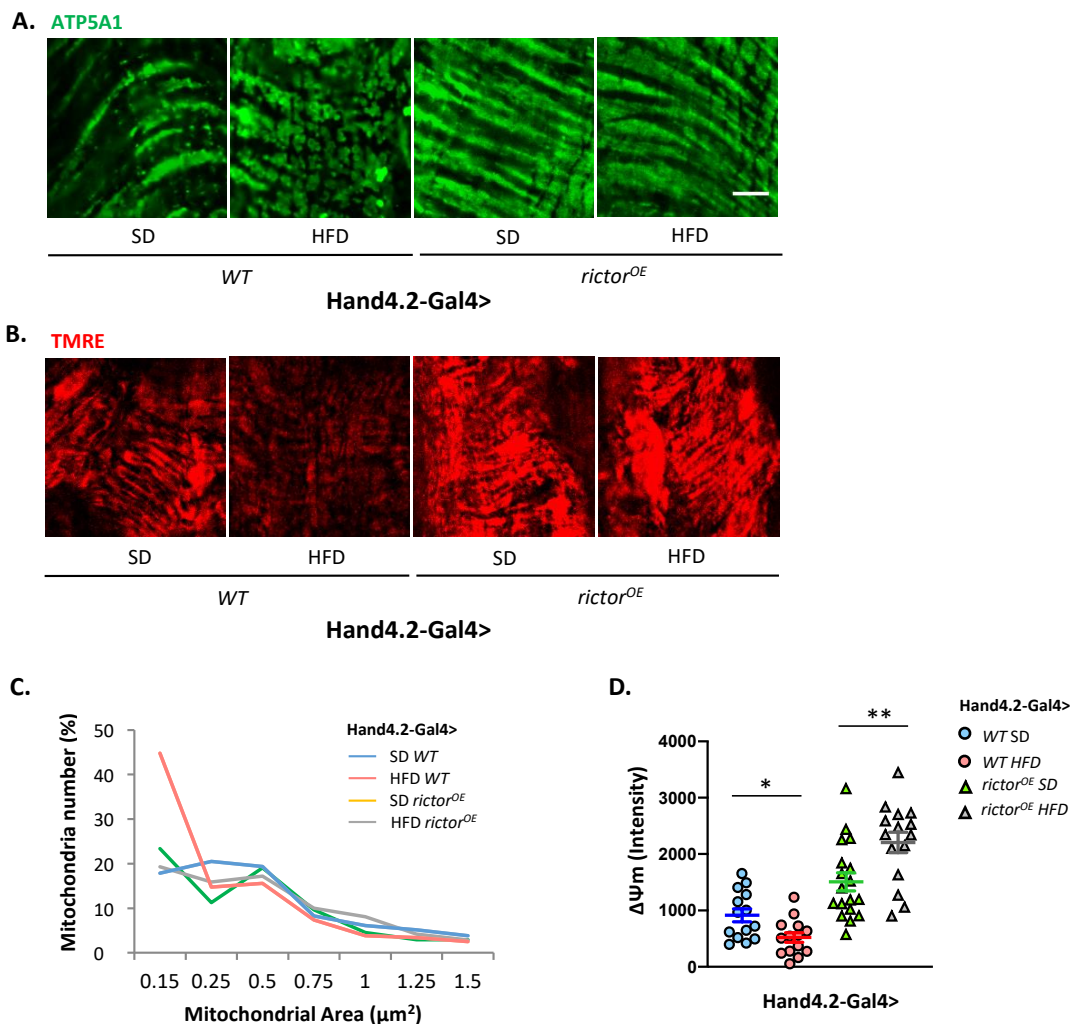

373

374 **Figure 4.** Overexpressing *rictor* rescues HFD-induced mitochondrial physiology

375 alteration in *Drosophila* heart. (A) Mitochondrial size and (B) mitochondrial membrane potential

376 in hearts of wildtype (*Hand4.2-Gal4>WT*) and cardiac-specific *rictor* overexpression flies upon

377 5 days SD or HFD feeding. ATP5A1 antibodies were used to detect mitochondria. (C) The group

378 histogram data for mitochondrial area of (A). (D) The intensity profile of TMRE measured in

379 (B). Flies were cultured at 40% relative humidity. *Hand-gal4* driver was used to drive gene

380 expression specifically in cardiac tissues (cardiomyocytes and pericardial cells). Scale bar is 20

381  $\mu\text{m}$ . N=5 and 3 ROIs were selected for each heart sample. Student t-test (\*  $p<0.05$ , \*\*  $p<0.01$ ).

382

383

384

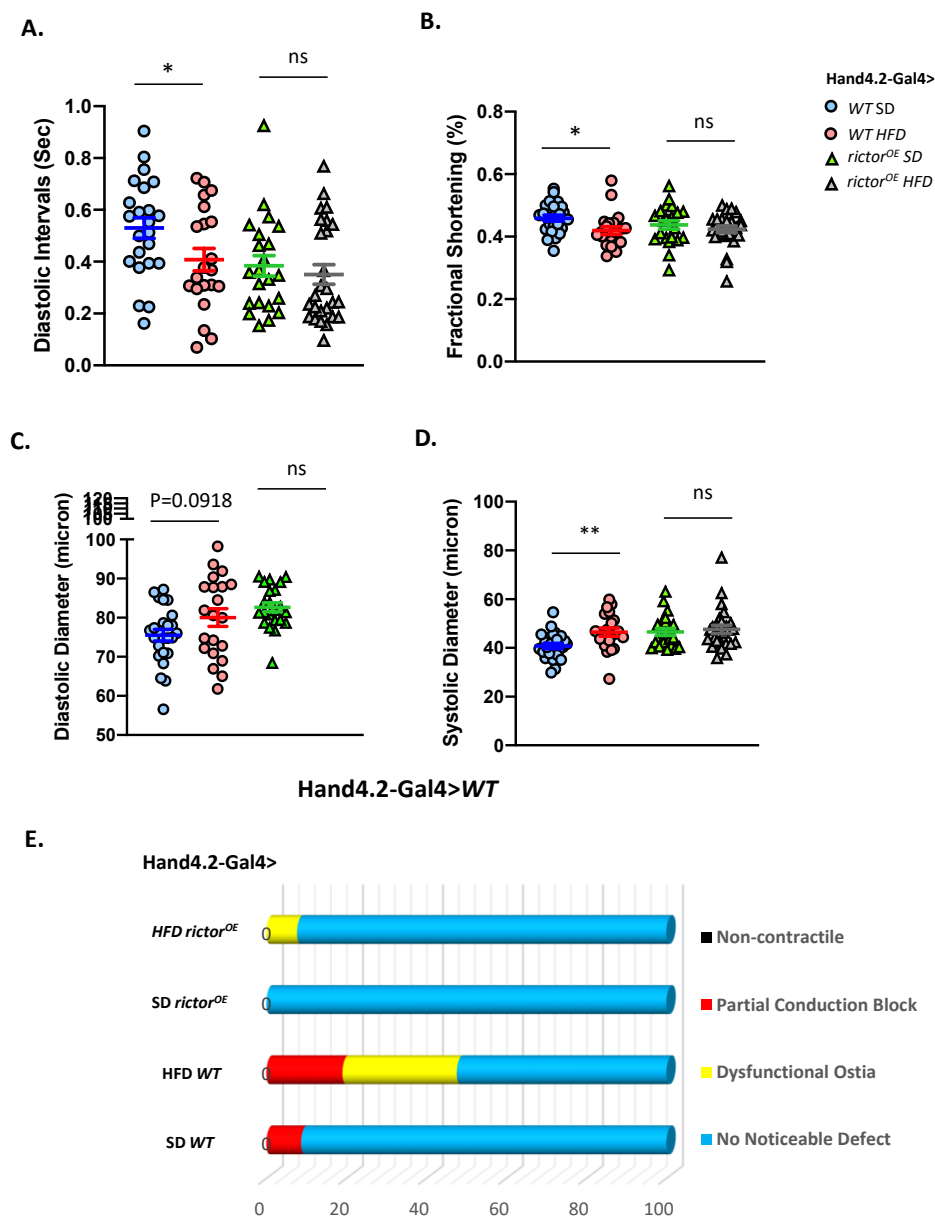

385  
 386 **Figure 5.** *rictor* overexpression rescues HFD-induced cardiac dysfunction in *Drosophila*.  
 387 (A) Diastolic interval (DI) and (B) fractional shortening (FS) of wildtype or *rictor*  
 388 overexpression heart upon 5 days of HFD or SD feeding. Flies were cultured at 40% relative  
 389 humidity. *Hand-gal4* driver was used to drive gene expression specifically in cardiac tissues  
 390 (cardiomyocytes and pericardial cells). N=21-25. Student t-test (\* p<0.05, ns: not significant).  
 391

392 **References:**

- 393 [1] M. Blüher, “Obesity: global epidemiology and pathogenesis,” *Nat. Rev. Endocrinol.*, vol.  
394 15, no. 5, pp. 288–298, 2019.
- 395 [2] R. T. Birse and R. Bodmer, “Lipotoxicity and cardiac dysfunction in mammals and  
396 *Drosophila*,” *Crit. Rev. Biochem. Mol. Biol.*, vol. 46, no. 5, pp. 376–385, Oct. 2011.
- 397 [3] C. Christoffersen *et al.*, “Cardiac lipid accumulation associated with diastolic dysfunction  
398 in obese mice,” *Endocrinology*, vol. 144, no. 8, pp. 3483–3490, Aug. 2003.
- 399 [4] Y. Zhang and J. Ren, “Role of cardiac steatosis and lipotoxicity in obesity  
400 cardiomyopathy,” *Hypertension (Dallas, Tex. : 1979)*, vol. 57, no. 2. United States, pp.  
401 148–150, Feb-2011.
- 402 [5] R. T. Birse *et al.*, “High fat-diet-induced obesity and heart dysfunction are regulated by  
403 the TOR pathway in *Drosophila*,” *Cell Metab.*, vol. 12, no. 5, pp. 533–544, Nov. 2010.
- 404 [6] G. D. Lopaschuk, C. D. L. Folmes, and W. C. Stanley, “Cardiac energy metabolism in  
405 obesity,” *Circ. Res.*, vol. 101, no. 4, pp. 335–347, Aug. 2007.
- 406 [7] H. Taegtmeyer, L. Golfman, S. Sharma, P. Razeghi, and M. van Arsdall, “Linking gene  
407 expression to function: metabolic flexibility in the normal and diseased heart,” *Ann. N. Y.*  
408 *Acad. Sci.*, vol. 1015, pp. 202–213, May 2004.
- 409 [8] S. R. Wall and G. D. Lopaschuk, “Glucose oxidation rates in fatty acid-perfused isolated  
410 working hearts from diabetic rats,” *Biochim. Biophys. Acta*, vol. 1006, no. 1, pp. 97–103,  
411 Nov. 1989.
- 412 [9] H.-C. Chiu *et al.*, “Transgenic expression of fatty acid transport protein 1 in the heart  
413 causes lipotoxic cardiomyopathy,” *Circ. Res.*, vol. 96, no. 2, pp. 225–233, Feb. 2005.
- 414 [10] A. J. Hoy, C. R. Bruce, S. M. Turpin, A. J. Morris, M. A. Febbraio, and M. J. Watt,  
415 “Adipose triglyceride lipase-null mice are resistant to high fat diet-induced insulin  
416 resistance despite reduced energy expenditure and ectopic lipid accumulation,”  
417 *Endocrinology*, vol. 152, no. 1, pp. 48–58, Jan. 2011.
- 418 [11] G. Haemmerle *et al.*, “Defective lipolysis and altered energy metabolism in mice lacking  
419 adipose triglyceride lipase,” *Science*, vol. 312, no. 5774, pp. 734–737, May 2006.
- 420 [12] K. Hirano, Y. Ikeda, N. Zaima, Y. Sakata, and G. Matsumiya, “Triglyceride deposit  
421 cardiomyovascularopathy,” *The New England journal of medicine*, vol. 359, no. 22. United  
422 States, pp. 2396–2398, Nov-2008.

- 423 [13] H. Yagyu *et al.*, “Lipoprotein lipase (LpL) on the surface of cardiomyocytes increases  
424 lipid uptake and produces a cardiomyopathy.,” *J. Clin. Invest.*, vol. 111, no. 3, pp. 419–  
425 426, Feb. 2003.
- 426 [14] D. M. Muoio, “Metabolic inflexibility: when mitochondrial indecision leads to metabolic  
427 gridlock.,” *Cell*, vol. 159, no. 6, pp. 1253–1262, Dec. 2014.
- 428 [15] S. Boudina *et al.*, “Mitochondrial Energetics in the Heart in Obesity-Related Diabetes,”  
429 *Diabetes*, vol. 56, no. 10, pp. 2457 LP – 2466, Oct. 2007.
- 430 [16] J. Hoeks *et al.*, “High fat diet-induced changes in mouse muscle mitochondrial  
431 phospholipids do not impair mitochondrial respiration despite insulin resistance.,” *PLoS*  
432 *One*, vol. 6, no. 11, p. e27274, 2011.
- 433 [17] R. P. J. Cormier, C. M. Champigny, C. J. Simard, P.-D. St-Coeur, and N. Pichaud,  
434 “Dynamic mitochondrial responses to a high fat diet in *Drosophila melanogaster*,” *Sci.*  
435 *Rep.*, vol. 9, no. 1, p. 4531, 2019.
- 436 [18] M. Laplante and D. M. Sabatini, “mTOR signaling in growth control and disease.,” *Cell*,  
437 vol. 149, no. 2, pp. 274–293, Apr. 2012.
- 438 [19] R. A. Saxton and D. M. Sabatini, “mTOR Signaling in Growth, Metabolism, and  
439 Disease,” *Cell*, vol. 168, no. 6, pp. 960–976, 2017.
- 440 [20] Z. Mao and W. Zhang, “Role of mTOR in Glucose and Lipid Metabolism,” *Int. J. Mol.*  
441 *Sci.*, vol. 19, no. 7, p. 2043, Jul. 2018.
- 442 [21] L. Ma *et al.*, “Perivascular fat-mediated vascular dysfunction and remodeling through the  
443 AMPK/mTOR pathway in high fat diet-induced obese rats.,” *Hypertens. Res.*, vol. 33, no.  
444 5, pp. 446–453, May 2010.
- 445 [22] J. Y. Bae *et al.*, “Exercise and dietary change ameliorate high fat diet induced obesity and  
446 insulin resistance via mTOR signaling pathway,” *J. Exerc. Nutr. Biochem.*, vol. 20, no. 2,  
447 pp. 28–33, Jun. 2016.
- 448 [23] O. I. Dadalko, K. Niswender, and A. Galli, “Impaired mTORC2 signaling in  
449 catecholaminergic neurons exaggerates high fat diet-induced hyperphagia,” *Heliyon*, vol.  
450 1, no. 1, pp. e00025–e00025, Sep. 2015.
- 451 [24] K. Chellappa *et al.*, “Hypothalamic mTORC2 is essential for metabolic health and  
452 longevity.,” *Aging Cell*, vol. 18, no. 5, p. e13014, Oct. 2019.
- 453 [25] N. Cybulski, P. Polak, J. Auwerx, M. A. Rüegg, and M. N. Hall, “mTOR complex 2 in

- 454 adipose tissue negatively controls whole-body growth.,” *Proc. Natl. Acad. Sci. U. S. A.*,  
455 vol. 106, no. 24, pp. 9902–9907, Jun. 2009.
- 456 [26] C. Betz, D. Stracka, C. Prescianotto-baschong, M. Frieden, and N. Demaurex, “associated  
457 endoplasmic reticulum membranes ( MAM ) regulates mitochondrial physiology,” *Proc.*  
458 *Natl. Acad. Sci. U. S. A.*, vol. 110, no. 31, p. 12526, 2013.
- 459 [27] J. Rieusset, “The role of endoplasmic reticulum-mitochondria contact sites in the control  
460 of glucose homeostasis: an update,” *Cell Death Dis.*, vol. 9, no. 3, p. 388, 2018.
- 461 [28] M. Xia, Y. Zhang, K. Jin, Z. Lu, Z. Zeng, and W. Xiong, “Communication between  
462 mitochondria and other organelles: a brand-new perspective on mitochondria in cancer,”  
463 *Cell Biosci.*, vol. 9, no. 1, p. 27, 2019.
- 464 [29] S. Wu and M.-H. Zou, “Mitochondria-associated endoplasmic reticulum membranes in the  
465 heart,” *Arch. Biochem. Biophys.*, vol. 662, pp. 201–212, Feb. 2019.
- 466 [30] L. T. Reiter, L. Potocki, S. Chien, M. Gribskov, and E. Bier, “A systematic analysis of  
467 human disease-associated gene sequences in *Drosophila melanogaster*.,” *Genome Res.*,  
468 vol. 11, no. 6, pp. 1114–1125, Jun. 2001.
- 469 [31] R. Bodmer, “Heart development in *Drosophila* and its relationship to vertebrates.,” *Trends*  
470 *Cardiovasc. Med.*, vol. 5, no. 1, pp. 21–28, 1995.
- 471 [32] K. Ocorr, L. Perrin, H.-Y. Lim, L. Qian, X. Wu, and R. Bodmer, “Genetic control of heart  
472 function and aging in *Drosophila*,” *Trends Cardiovasc. Med.*, vol. 17, no. 5, pp. 177–182,  
473 Jul. 2007.
- 474 [33] G. Lee and J. H. Park, “Hemolymph sugar homeostasis and starvation-induced  
475 hyperactivity affected by genetic manipulations of the adipokinetic hormone-encoding  
476 gene in *Drosophila melanogaster*.,” *Genetics*, vol. 167, no. 1, pp. 311–323, May 2004.
- 477 [34] J. Colombani, S. Raisin, S. Pantalacci, T. Radimerski, J. Montagne, and P. Léopold, “A  
478 nutrient sensor mechanism controls *Drosophila* growth.,” *Cell*, vol. 114, no. 6, pp. 739–  
479 749, Sep. 2003.
- 480 [35] A. Cammarato *et al.*, “Myosin transducer mutations differentially affect motor function,  
481 myofibril structure, and the performance of skeletal and cardiac muscles,” *Mol. Biol. Cell*,  
482 vol. 19, no. 2, pp. 553–562, Feb. 2008.
- 483 [36] A. W. Gao, C. Cantó, and R. H. Houtkooper, “Mitochondrial response to nutrient  
484 availability and its role in metabolic disease,” *EMBO Mol. Med.*, vol. 6, no. 5, pp. 580–

- 485 589, May 2014.
- 486 [37] M. Liesa and O. S. Shirihai, “Mitochondrial Dynamics in the Regulation of Nutrient  
487 Utilization and Energy Expenditure,” *Cell Metab.*, vol. 17, no. 4, pp. 491–506, Apr. 2013.
- 488 [38] C. Frezza *et al.*, “OPA1 controls apoptotic cristae remodeling independently from  
489 mitochondrial fusion.,” *Cell*, vol. 126, no. 1, pp. 177–189, Jul. 2006.
- 490 [39] C. Bonnard *et al.*, “Mitochondrial dysfunction results from oxidative stress in the skeletal  
491 muscle of diet-induced insulin-resistant mice.,” *J. Clin. Invest.*, vol. 118, no. 2, pp. 789–  
492 800, Feb. 2008.
- 493 [40] L. D. Zorova *et al.*, “Mitochondrial membrane potential,” *Anal. Biochem.*, vol. 552, pp.  
494 50–59, Jul. 2018.
- 495 [41] I. Goehring, A. A. Gerencser, S. Schmidt, M. D. Brand, H. Mulder, and D. G. Nicholls,  
496 “Plasma membrane potential oscillations in insulin secreting Ins-1 832/13 cells do not  
497 require glycolysis and are not initiated by fluctuations in mitochondrial bioenergetics.,” *J.*  
498 *Biol. Chem.*, vol. 287, no. 19, pp. 15706–15717, May 2012.
- 499 [42] M. P. Mollica, S. Iossa, G. Liverini, and S. Soboll, “Steady state changes in mitochondrial  
500 electrical potential and proton gradient in perfused liver from rats fed a high fat diet,” *Mol.*  
501 *Cell. Biochem.*, vol. 178, no. 1, pp. 213–217, 1998.
- 502 [43] A. Zalewska, D. Ziembicka, M. Żendzian-Piotrowska, and M. Maciejczyk, “The Impact  
503 of High fat Diet on Mitochondrial Function, Free Radical Production, and Nitrosative  
504 Stress in the Salivary Glands of Wistar Rats,” *Oxid. Med. Cell. Longev.*, vol. 2019, p.  
505 2606120, 2019.
- 506 [44] F. Zurlo, K. Larson, C. Bogardus, and E. Ravussin, “Skeletal muscle metabolism is a  
507 major determinant of resting energy expenditure.,” *J. Clin. Invest.*, vol. 86, no. 5, pp.  
508 1423–1427, Nov. 1990.
- 509 [45] B. Glancy and R. S. Balaban, “Role of mitochondrial Ca<sup>2+</sup> in the regulation of cellular  
510 energetics,” *Biochemistry*, vol. 51, no. 14, pp. 2959–2973, Apr. 2012.
- 511 [46] R. Wong, C. Steenbergen, and E. Murphy, “Mitochondrial permeability transition pore  
512 and calcium handling,” *Methods Mol. Biol.*, vol. 810, pp. 235–242, 2012.
- 513 [47] C. Giorgi *et al.*, “Mitochondrial Ca(2+) and apoptosis,” *Cell Calcium*, vol. 52, no. 1, pp.  
514 36–43, Jul. 2012.
- 515 [48] J. R. Hom, J. S. Gewandter, L. Michael, S.-S. Sheu, and Y. Yoon, “Thapsigargin induces

- 516 biphasic fragmentation of mitochondria through calcium-mediated mitochondrial fission  
517 and apoptosis.” *J. Cell. Physiol.*, vol. 212, no. 2, pp. 498–508, Aug. 2007.
- 518 [49] J. Hom, T. Yu, Y. Yoon, G. Porter, and S.-S. Sheu, “Regulation of mitochondrial fission  
519 by intracellular Ca<sup>2+</sup> in rat ventricular myocytes,” *Biochim. Biophys. Acta*, vol. 1797, no.  
520 6–7, pp. 913–921, 2010.
- 521 [50] G. Favaro *et al.*, “DRP1-mediated mitochondrial shape controls calcium homeostasis and  
522 muscle mass,” *Nat. Commun.*, vol. 10, no. 1, p. 2576, 2019.
- 523 [51] A. P. Arruda, B. M. Pers, G. Parlakgöl, E. Güney, K. Inouye, and G. S. Hotamisligil,  
524 “Chronic enrichment of hepatic endoplasmic reticulum-mitochondria contact leads to  
525 mitochondrial dysfunction in obesity.” *Nat. Med.*, vol. 20, no. 12, pp. 1427–1435, Dec.  
526 2014.
- 527 [52] E. J. Griffiths and A. P. Halestrap, “Mitochondrial non-specific pores remain closed  
528 during cardiac ischaemia, but open upon reperfusion.” *Biochem. J.*, vol. 307 ( Pt 1, no. Pt  
529 1, pp. 93–98, Apr. 1995.
- 530 [53] E. Murphy and C. Steenbergen, “Mechanisms underlying acute protection from cardiac  
531 ischemia-reperfusion injury.” *Physiol. Rev.*, vol. 88, no. 2, pp. 581–609, Apr. 2008.
- 532 [54] B. Littlejohns *et al.*, “Hearts from mice fed a non-obesogenic high fat diet exhibit changes  
533 in their oxidative state, calcium and mitochondria in parallel with increased susceptibility  
534 to reperfusion injury.” *PLoS One*, vol. 9, no. 6, p. e100579, 2014.
- 535 [55] Z. Wu *et al.*, “Tricornered / NDR kinase signaling mediates PINK1-directed  
536 mitochondrial quality control and tissue maintenance service Tricornered / NDR kinase  
537 signaling mediates PINK1-directed mitochondrial quality control and tissue maintenance,”  
538 *Cold Spring Harb. Lab. Press*, pp. 157–162, 2013.
- 539 [56] H. Aspernig *et al.*, “Mitochondrial Perturbations Couple mTORC2 to Autophagy in  
540 *C. elegans*.” *Cell Rep.*, vol. 29, no. 6, pp. 1399-1409.e5, Nov. 2019.
- 541 [57] K. Chang *et al.*, “TGFB-INHB/activin signaling regulates age-dependent autophagy and  
542 cardiac health through inhibition of MTORC2,” *Autophagy*, pp. 1–16, Dec. 2019.
- 543 [58] Z. Han and E. N. Olson, “&lt;em&gt;Hand&lt;/em&gt; is a direct target of Tinman and  
544 GATA factors during &lt;em&gt;Drosophila&lt;/em&gt; cardiogenesis and  
545 hematopoiesis,” *Development*, vol. 132, no. 15, pp. 3525 LP – 3536, Aug. 2005.
- 546 [59] I. Jevtov *et al.*, “TORC2 mediates the heat stress response in *Drosophila* by promoting the

- 547 formation of stress granules.,” *J. Cell Sci.*, vol. 128, no. 14, pp. 2497–2508, Jul. 2015.
- 548 [60] G. Vogler and K. Ocorr, “Visualizing the beating heart in *Drosophila*.,” *J. Vis. Exp.*, no.  
549 31, pp. 6–8, 2009.
- 550 [61] J.-P. Leduc-Gaudet *et al.*, “The impact of a short-term high fat diet on mitochondrial  
551 respiration, reactive oxygen species production, and dynamics in oxidative and glycolytic  
552 skeletal muscles of young rats.,” *Physiol. Rep.*, vol. 6, no. 4, Feb. 2018.
- 553 [62] D. Jha and P. Mitra Mazumder, “High fat diet administration leads to the mitochondrial  
554 dysfunction and selectively alters the expression of class 1 GLUT protein in mice,” *Mol.*  
555 *Biol. Rep.*, vol. 46, no. 2, pp. 1727–1736, 2019.
- 556 [63] T. Mingming *et al.*, “Mitophagy Is Essential for Maintaining Cardiac Function During  
557 High Fat Diet-Induced Diabetic Cardiomyopathy,” *Circ. Res.*, vol. 124, no. 9, pp. 1360–  
558 1371, Apr. 2019.
- 559 [64] L. M. Sparks *et al.*, “A High fat Diet Coordinately Downregulates Genes Required for  
560 Mitochondrial Oxidative Phosphorylation in Skeletal Muscle,” *Diabetes*, vol. 54, no. 7,  
561 pp. 1926 LP – 1933, Jul. 2005.
- 562 [65] C. R. Hancock *et al.*, “High fat diets cause insulin resistance despite an increase in muscle  
563 mitochondria.,” *Proc. Natl. Acad. Sci. U. S. A.*, vol. 105, no. 22, pp. 7815–7820, Jun.  
564 2008.
- 565 [66] P. M. Miotto, P. J. LeBlanc, and G. P. Holloway, “High fat Diet Causes Mitochondrial  
566 Dysfunction as a Result of Impaired ADP Sensitivity.,” *Diabetes*, vol. 67, no. 11, pp.  
567 2199–2205, Nov. 2018.
- 568 [67] M. M. Thomas *et al.*, “Early oxidative shifts in mouse skeletal muscle morphology with  
569 high fat diet consumption do not lead to functional improvements.,” *Physiol. Rep.*, vol. 2,  
570 no. 9, Sep. 2014.
- 571 [68] D. Xu *et al.*, “Mitochondrial dysfunction and inhibition of myoblast differentiation in  
572 mice with high fat-diet-induced pre-diabetes.,” *J. Cell. Physiol.*, vol. 234, no. 5, pp.  
573 7510–7523, May 2019.
- 574 [69] E. Heyne, A. Schrepper, T. Doenst, C. Schenkl, K. Kreuzer, and M. Schwarzer, “High fat  
575 diet affects skeletal muscle mitochondria comparable to pressure overload-induced heart  
576 failure,” *J. Cell. Mol. Med.*, vol. 24, no. 12, pp. 6741–6749, Jun. 2020.
- 577 [70] H.-F. Jheng *et al.*, “Mitochondrial fission contributes to mitochondrial dysfunction and



- 578 insulin resistance in skeletal muscle,” *Mol. Cell. Biol.*, vol. 32, no. 2, pp. 309–319, Jan.  
579 2012.
- 580 [71] W. Jørgensen, K. A. Rud, O. H. Mortensen, L. Frandsen, N. Grunnet, and B. Quistorff,  
581 “Your mitochondria are what you eat: a high fat or a high-sucrose diet eliminates  
582 metabolic flexibility in isolated mitochondria from rat skeletal muscle,” *Physiol. Rep.*, vol.  
583 5, no. 6, p. e13207, Mar. 2017.
- 584 [72] D. Chen, X. Li, L. Zhang, M. Zhu, and L. Gao, “A high fat diet impairs mitochondrial  
585 biogenesis, mitochondrial dynamics, and the respiratory chain complex in rat myocardial  
586 tissues,” *J. Cell. Biochem.*, vol. 119, no. 11, p. 9602, Nov. 2018.
- 587 [73] Y. Che *et al.*, “Role of autophagy in a model of obesity: A long-term high fat diet induces  
588 cardiac dysfunction,” *Mol Med Rep*, vol. 18, no. 3, pp. 3251–3261, 2018.
- 589  
590  
591
